# Supplementary material for: A Study of Phytochemistry, Genoprotective Activity, and Antitumor Effects of Extracts of the Selected Lamiaceae Species
Source: MDPI journal article supplement (doi:10.3390/plants10112306), 2021-10-27
Supplement: s1 [file s1]

**Table S1.** The content of polyphenolic components (total phenolic (TPC), phenolic acid (PAC), total flavonoid (TFC) and flavonol content (FC)) of the selected plant extracts presented on three concentrations (100, 250, and 500  $\mu\text{g/mL}$ ) as means  $\pm$  standard deviation.

| Species   | Extract<br>concentration ( $\mu\text{g/mL}$ ) | TPC (mg GAE/g)   |                  |                   | PAC (mg CAE/g)   |                   |                   | TFC (mg QE/g)    |                  |                  | FC (mg QE/g)    |                  |                  |
|-----------|-----------------------------------------------|------------------|------------------|-------------------|------------------|-------------------|-------------------|------------------|------------------|------------------|-----------------|------------------|------------------|
|           |                                               | 100              | 250              | 500               | 100              | 250               | 500               | 100              | 250              | 500              | 100             | 250              | 500              |
| <i>Mo</i> | Methanolic                                    | 32.40 $\pm$ 1.22 | 79.40 $\pm$ 3.78 | 147.77 $\pm$ 5.74 | 19.37 $\pm$ 2.31 | 58.26 $\pm$ 8.34  | 176.04 $\pm$ 6.42 | 4.17 $\pm$ 0.25  | 11.25 $\pm$ 1.13 | 21.16 $\pm$ 2.05 | nd              | 0.90 $\pm$ 0.29  | 4.58 $\pm$ 0.23  |
|           | Ethanollic                                    | 30.64 $\pm$ 0.59 | 70.30 $\pm$ 1.52 | 132.15 $\pm$ 1.43 | 39.74 $\pm$ 1.70 | 67.89 $\pm$ 1.92  | 163.81 $\pm$ 6.79 | 3.48 $\pm$ 0.46  | 10.13 $\pm$ 0.43 | 16.03 $\pm$ 2.48 | 0.17 $\pm$ 0.09 | 0.96 $\pm$ 0.23  | 3.46 $\pm$ 0.12  |
|           | Aqueous                                       | 31.72 $\pm$ 0.34 | 74.22 $\pm$ 1.39 | 145.85 $\pm$ 3.74 | 13.81 $\pm$ 1.28 | 40.48 $\pm$ 2.31  | 132.70 $\pm$ 5.59 | 0.87 $\pm$ 0.28  | 5.97 $\pm$ 0.22  | 15.19 $\pm$ 0.84 | nd              | 1.30 $\pm$ 0.55  | 3.88 $\pm$ 0.10  |
| <i>Mp</i> | Methanolic                                    | 33.74 $\pm$ 1.58 | 77.12 $\pm$ 4.11 | 144.15 $\pm$ 2.66 | 8.26 $\pm$ 2.57  | 51.59 $\pm$ 2.80  | 123.07 $\pm$ 4.21 | 12.06 $\pm$ 0.27 | 32.00 $\pm$ 0.44 | 57.56 $\pm$ 2.83 | 3.71 $\pm$ 0.42 | 11.09 $\pm$ 0.20 | 21.90 $\pm$ 0.35 |
|           | Ethanollic                                    | 31.03 $\pm$ 2.74 | 70.79 $\pm$ 2.10 | 130.62 $\pm$ 0.30 | 11.22 $\pm$ 2.94 | 54.56 $\pm$ 2.94  | 161.96 $\pm$ 2.31 | 11.28 $\pm$ 0.59 | 30.85 $\pm$ 0.35 | 54.80 $\pm$ 1.60 | 4.23 $\pm$ 0.15 | 11.34 $\pm$ 0.26 | 23.75 $\pm$ 0.52 |
|           | Aqueous                                       | 33.15 $\pm$ 0.80 | 76.27 $\pm$ 2.64 | 146.01 $\pm$ 2.97 | 2.33 $\pm$ 1.11  | 16.41 $\pm$ 1.70  | 86.41 $\pm$ 1.70  | 4.32 $\pm$ 0.11  | 21.31 $\pm$ 0.34 | 43.02 $\pm$ 0.83 | 1.26 $\pm$ 0.15 | 5.33 $\pm$ 0.21  | 10.07 $\pm$ 0.26 |
| <i>Ob</i> | Methanolic                                    | 7.68 $\pm$ 0.37  | 19.71 $\pm$ 0.40 | 38.76 $\pm$ 2.63  | nd               | 12.70 $\pm$ 7.40  | 18.26 $\pm$ 5.48  | 3.02 $\pm$ 0.19  | 8.58 $\pm$ 0.35  | 18.92 $\pm$ 3.43 | nd              | 0.96 $\pm$ 0.47  | 3.58 $\pm$ 0.12  |
|           | Ethanollic                                    | 11.59 $\pm$ 0.60 | 29.14 $\pm$ 0.37 | 55.14 $\pm$ 1.52  | 11.96 $\pm$ 0.64 | 19.00 $\pm$ 3.33  | 10.85 $\pm$ 5.25  | 3.23 $\pm$ 0.19  | 10.28 $\pm$ 0.33 | 18.67 $\pm$ 0.78 | 0.36 $\pm$ 0.12 | 2.67 $\pm$ 0.21  | 5.98 $\pm$ 0.07  |
|           | Aqueous                                       | 9.80 $\pm$ 0.26  | 24.28 $\pm$ 0.17 | 50.50 $\pm$ 1.02  | nd               | nd                | 15.30 $\pm$ 2.80  | 2.46 $\pm$ 0.71  | 8.76 $\pm$ 0.57  | 16.84 $\pm$ 0.95 | 0.20 $\pm$ 0.19 | 0.55 $\pm$ 0.54  | 2.15 $\pm$ 0.36  |
| <i>Ro</i> | Methanolic                                    | 23.59 $\pm$ 0.10 | 57.32 $\pm$ 0.54 | 111.53 $\pm$ 1.89 | 28.26 $\pm$ 2.80 | 68.63 $\pm$ 8.34  | 119.37 $\pm$ 7.56 | 7.18 $\pm$ 0.28  | 18.52 $\pm$ 1.15 | 40.76 $\pm$ 1.90 | 1.57 $\pm$ 0.58 | 3.75 $\pm$ 0.13  | 9.36 $\pm$ 0.55  |
|           | Ethanollic                                    | 21.73 $\pm$ 0.29 | 54.09 $\pm$ 2.33 | 109.06 $\pm$ 2.55 | 17.52 $\pm$ 3.90 | 33.07 $\pm$ 1.70  | 140.85 $\pm$ 5.25 | 4.17 $\pm$ 0.09  | 12.09 $\pm$ 0.28 | 23.70 $\pm$ 1.89 | 1.32 $\pm$ 0.20 | 2.50 $\pm$ 0.06  | 5.81 $\pm$ 0.29  |
|           | Aqueous                                       | 29.82 $\pm$ 2.48 | 76.37 $\pm$ 0.74 | 139.42 $\pm$ 2.19 | 23.44 $\pm$ 1.11 | 33.44 $\pm$ 4.44  | 116.78 $\pm$ 6.67 | 6.03 $\pm$ 0.41  | 14.82 $\pm$ 0.38 | 29.05 $\pm$ 0.34 | 2.84 $\pm$ 0.23 | 5.77 $\pm$ 0.43  | 12.02 $\pm$ 0.68 |
| <i>So</i> | Methanolic                                    | 29.27 $\pm$ 0.85 | 70.79 $\pm$ 2.16 | 131.89 $\pm$ 0.65 | 18.26 $\pm$ 0.64 | 46.78 $\pm$ 6.19  | 103.44 $\pm$ 2.94 | 9.48 $\pm$ 0.32  | 26.93 $\pm$ 0.67 | 53.09 $\pm$ 1.86 | 4.17 $\pm$ 0.36 | 8.84 $\pm$ 0.39  | 14.87 $\pm$ 0.72 |
|           | Ethanollic                                    | 27.87 $\pm$ 0.99 | 69.26 $\pm$ 5.77 | 134.89 $\pm$ 2.91 | 11.59 $\pm$ 1.70 | 50.11 $\pm$ 10.94 | 99.00 $\pm$ 8.39  | 7.09 $\pm$ 0.30  | 19.95 $\pm$ 0.05 | 43.86 $\pm$ 1.43 | 2.54 $\pm$ 0.20 | 6.91 $\pm$ 0.20  | 13.83 $\pm$ 0.10 |
|           | Aqueous                                       | 16.68 $\pm$ 0.89 | 44.63 $\pm$ 0.64 | 84.98 $\pm$ 1.87  | nd               | 30.85 $\pm$ 2.31  | 64.56 $\pm$ 5.56  | 8.86 $\pm$ 0.91  | 20.50 $\pm$ 0.14 | 39.98 $\pm$ 0.85 | 3.09 $\pm$ 0.18 | 8.01 $\pm$ 0.30  | 14.73 $\pm$ 0.07 |
| <i>Sm</i> | Methanolic                                    | 21.99 $\pm$ 0.41 | 55.17 $\pm$ 1.87 | 106.67 $\pm$ 3.64 | 19.74 $\pm$ 2.31 | 64.56 $\pm$ 3.33  | 130.11 $\pm$ 1.11 | 3.85 $\pm$ 0.19  | 10.47 $\pm$ 0.53 | 26.16 $\pm$ 1.03 | 2.48 $\pm$ 0.35 | 4.39 $\pm$ 0.27  | 9.09 $\pm$ 0.65  |
|           | Ethanollic                                    | 28.49 $\pm$ 0.78 | 66.52 $\pm$ 1.21 | 134.56 $\pm$ 0.49 | 5.67 $\pm$ 1.11  | 44.93 $\pm$ 3.57  | 105.67 $\pm$ 9.09 | 4.04 $\pm$ 0.23  | 12.30 $\pm$ 0.22 | 28.92 $\pm$ 0.57 | 1.40 $\pm$ 0.12 | 4.06 $\pm$ 0.31  | 8.35 $\pm$ 0.55  |
|           | Aqueous                                       | 23.95 $\pm$ 0.98 | 63.49 $\pm$ 1.57 | 118.35 $\pm$ 2.40 | 1.59 $\pm$ 0.64  | 35.30 $\pm$ 7.23  | 75.67 $\pm$ 6.76  | 4.57 $\pm$ 0.22  | 12.46 $\pm$ 0.24 | 27.34 $\pm$ 0.14 | 3.48 $\pm$ 0.35 | 6.62 $\pm$ 0.29  | 12.82 $\pm$ 0.70 |

nd – not detected
